# Supplementary material for: The Electronic Structure of Short Carbon Nanotubes: The Effects of Correlation
Source: Hindawi journal article supplement (doi:10.1155/2015/475890), 2015-01-01
Supplement: f1 [file 475890.f1.pdf]

# Supplementary material

March 27, 2015

This section contains additional information and tables about the geometry and the nature of the electronic states.

# 1 The table of geometry of nanotubes $n_p$ (Å)

The section 1 presents the detailed geometry of the nanotubes. The  $D_{na}/D_{nh}$  symmetry is respected and the symmetric atoms are assigned the same distance parameters.

The axis of the nanotube is taken as the z-axis, consequently, the distances of the atoms from the  $\sigma_h/\sigma_v$  plane are given by  $z_i$ . The radial distances from the axis of the nanotube are given  $r_i$ . The indices  $i$  distinguish symmetrically different atoms of the nanotube thus, all atoms which are equivalent in the symmetry group of the given nanotube have the same index  $i$ . Taking the hydrogen atoms for example, all the atoms have been assigned the same radial distance from the axis of the nanotube (rh) and the same longitudinal distance (zh) from the  $\sigma_h/\sigma_v$  plane of the nanotube. The rings of C atoms which makes up the body of the nanotube follow the same rule, the carbon atoms at the same distance z0, z1, .. above the  $\sigma_h$  plane for example, are at the same radial distance r0, r1, ... respectively from the axis of the nanotube.

Table 1: Nanotubes ( $n_p$ ) where  $n=6$   $p$ =even

| p | rh      | r0      | r1      | r2      | r3      | r4      | r5      | r6      |
|---|---------|---------|---------|---------|---------|---------|---------|---------|
|   | zh      | z0      | z1      | r2      | z3      | z4      | z5      | z6      |
| 2 | 2.38043 | 2.39593 | 2.39548 | 2.41332 |         |         |         |         |
|   | 3.55954 | 0.35020 | 1.79977 | 2.47664 |         |         |         |         |
| 4 | 2.37984 | 2.40148 | 2.40054 | 2.39927 | 2.41438 | 2.39690 |         |         |
|   | 5.70045 | 0.35175 | 1.79061 | 2.49286 | 4.61762 | 3.94033 |         |         |
| 6 | 2.38007 | 2.40445 | 2.40349 | 2.40326 | 2.39982 | 2.40114 | 2.39712 | 2.41464 |
|   | 7.83959 | 0.35233 | 1.78782 | 2.49218 | 3.92973 | 4.63234 | 6.07937 | 6.75679 |

Table 2: Nanotubes ( $n_p$ ) where  $n=6$   $p$ =odd

| p | rh      | r1      | r2      | r3      | r4      | r5      | r6      |
|---|---------|---------|---------|---------|---------|---------|---------|
|   | zh      | z1      | z2      | z3      | z4      | z5      | z6      |
| 1 | 2.37408 | 2.40928 | 2.39449 |         |         |         |         |
|   | 2.48737 | 0.72848 | 1.40452 |         |         |         |         |
| 3 | 2.37975 | 2.39784 | 2.39939 | 2.39669 | 2.41409 |         |         |
|   | 4.63032 | 0.72046 | 1.42227 | 2.87034 | 3.54748 |         |         |
| 5 | 2.37889 | 2.40301 | 2.40323 | 2.39951 | 2.39870 | 2.41418 | 2.39446 |
|   | 6.77400 | 1.42870 | 0.71170 | 3.56871 | 2.85434 | 5.69110 | 5.00646 |

Table 3: Nanotubes ( $n-p$ ) where  $n=7$   $p$ =even

| P | rh      | r0      | r1      | r2      | r3      | r4      | r5      | r6      |
|---|---------|---------|---------|---------|---------|---------|---------|---------|
|   | zh      | z0      | z1      | z2      | z3      | z4      | z5      | z6      |
| 2 | 2.77780 | 2.78436 | 2.78531 | 2.80241 |         |         |         |         |
|   | 3.55398 | 0.35295 | 1.78992 | 2.47118 |         |         |         |         |
| 4 | 2.77623 | 2.79032 | 2.78851 | 2.78818 | 2.80259 | 2.78640 |         |         |
|   | 5.68876 | 0.35450 | 1.78098 | 2.48864 | 4.60600 | 3.92447 |         |         |
| 6 | 2.77645 | 2.79313 | 2.79167 | 2.79223 | 2.78882 | 2.78846 | 2.80272 | 2.78650 |
|   | 7.82220 | 0.35491 | 1.77898 | 2.48857 | 4.62222 | 3.91433 | 6.05784 | 6.73944 |

Table 4: Nanotubes ( $n-p$ ) where  $n=7$   $p$ =odd

| P | rh      | r1      | r2      | r3      | r4      | r5      | r6      |
|---|---------|---------|---------|---------|---------|---------|---------|
|   | zh      | z1      | z2      | z3      | z4      | z5      | z6      |
| 1 | 2.77417 | 2.80055 | 2.78521 |         |         |         |         |
|   | 2.48478 | 1.40199 | 0.72142 |         |         |         |         |
| 3 | 2.77635 | 2.78667 | 2.78757 | 2.78633 | 2.80254 |         |         |
|   | 4.62170 | 0.71404 | 1.42138 | 2.85751 | 3.53893 |         |         |
| 5 | 2.77754 | 2.79198 | 2.79131 | 2.78803 | 2.78841 | 2.78653 | 2.80331 |
|   | 6.75554 | 0.71233 | 1.42172 | 2.84768 | 3.55557 | 4.99126 | 5.67273 |

Table 5: Nanotubes ( $n-p$ ) where  $n=8$   $p$ =even

| P | rh      | r0      | r1      | r2      | r3      | r4      | r5      | r6      |
|---|---------|---------|---------|---------|---------|---------|---------|---------|
|   | zh      | z0      | z1      | z2      | z3      | z4      | z5      | z6      |
| 2 | 3.15320 | 3.15577 | 3.15864 | 3.17467 |         |         |         |         |
|   | 3.56416 | 0.34999 | 1.80445 | 2.48143 |         |         |         |         |
| 4 | 3.15298 | 3.16317 | 3.17687 | 3.16177 | 3.16230 | 3.16127 |         |         |
|   | 5.70706 | 0.35199 | 2.49564 | 1.79323 | 4.62437 | 3.94685 |         |         |
| 6 | 3.14085 | 3.17056 | 3.16979 | 3.16972 | 3.16752 | 3.16781 | 3.14558 | 3.16399 |
|   | 7.85805 | 0.35265 | 2.49270 | 1.78810 | 4.63263 | 3.93097 | 6.77092 | 6.08106 |

Table 6: Nanotubes ( $n-p$ ) where  $n=8$   $p$ =odd

| P | rh      | r1      | r2      | r3      | r4      | r5      | r6      |
|---|---------|---------|---------|---------|---------|---------|---------|
|   | rh      | r1      | r2      | r3      | r4      | r5      | r6      |
| 1 | 3.14341 | 3.15724 | 3.16918 |         |         |         |         |
|   | 2.49010 | 0.73143 | 1.40740 |         |         |         |         |
| 3 | 3.15302 | 3.15838 | 3.16014 | 3.16103 | 3.17627 |         |         |
|   | 4.63622 | 1.42395 | 0.72217 | 2.87625 | 3.55352 |         |         |
| 5 | 3.15333 | 3.16571 | 3.16640 | 3.16330 | 3.16240 | 3.17737 | 3.16225 |
|   | 6.77688 | 1.42362 | 0.71876 | 3.56602 | 2.86314 | 5.69419 | 5.01651 |

Table 7: Nanotubes ( $n_p$ ) where  $n=9$   $p$ =even

| p | rh      | r0      | r1      | r2      | r3      | r4      | r5      | r6      |
|---|---------|---------|---------|---------|---------|---------|---------|---------|
|   | zh      | z0      | z1      | z2      | z3      | z4      | z5      | z6      |
| 2 | 3.58513 | 3.57454 | 3.57769 | 3.59746 |         |         |         |         |
|   | 3.54672 | 0.35806 | 1.77540 | 2.46409 |         |         |         |         |
| 4 | 3.54689 | 3.55089 | 3.55030 | 3.54916 | 3.56807 | 3.55098 |         |         |
|   | 5.70286 | 0.35280 | 2.49352 | 1.78972 | 4.62018 | 3.94270 |         |         |
| 6 | 3.56757 | 3.56989 | 3.56705 | 3.56827 | 3.56343 | 3.56303 | 3.58407 | 3.56477 |
|   | 7.91076 | 0.34908 | 2.48603 | 1.78786 | 4.62296 | 3.78192 | 6.76018 | 6.06174 |

Table 8: Nanotubes ( $n_p$ ) where  $n=9$   $p$ =odd

| p | rh      | r1      | r2      | r3      | r4      | r5      | r6      |
|---|---------|---------|---------|---------|---------|---------|---------|
|   | zh      | z1      | z2      | z3      | z4      | z5      | z6      |
| 1 | 3.54175 | 3.56223 | 3.55080 |         |         |         |         |
|   | 2.48727 | 0.72861 | 1.40453 |         |         |         |         |
| 3 | 3.54943 | 3.54914 | 3.55073 | 3.55312 | 3.56716 |         |         |
|   | 4.62907 | 0.71811 | 1.42268 | 2.86662 | 3.54639 |         |         |
| 5 | 3.54859 | 3.55379 | 3.55471 | 3.55142 | 3.55057 | 3.56955 | 3.55200 |
|   | 6.77060 | 1.42288 | 0.71655 | 3.56229 | 2.85804 | 5.68789 | 5.01014 |

## 2 State-specific energies

In this section, we report the state specific calculations for some representative of each class of nanotube. These calculations were carried out at the CAS-SCF level using the active space and the ROHF geometries described in the paper. The geometry was then optimized at the same level before inclusion of the dynamic correlation using the NEVPT2 method. The resulting state specific CASSCF (before and after geometry optimization) and NEVPT2 energies are reported in 9 and 10.

| n_p | State   | CAS-SCF               | CAS-SCF               | NEVPT2 |
|-----|---------|-----------------------|-----------------------|--------|
|     |         | OPTIMIZED             |                       |        |
| 6.4 | $^1A_1$ | $2.44 \cdot 10^{-5}$  | $2.63 \cdot 10^{-5}$  | -5.89  |
|     | $^3A_2$ | 0.00                  | 0.00                  | 0.00   |
|     | $^1E$   | 250.74                | 249.00                | 276.79 |
| 6.5 | $^1A_1$ | $-3.13 \cdot 10^{-4}$ | $-3.41 \cdot 10^{-4}$ | -3.66  |
|     | $^3A_2$ | 0.00                  | 0.00                  | 0.00   |
|     | $^1E_2$ | 433.66                | 418.79                | 170.76 |

Table 9: State-specific energy differences for  $e_p$  nanotubes calculated by performing CAS-SCF separately for each state followed by geometry optimization and NEVPT2 calculation

| n_p | State      | CAS-SCF   | CAS-SCF | NEVPT2                |
|-----|------------|-----------|---------|-----------------------|
|     |            | OPTIMIZED |         |                       |
| 7.4 | $^1A_{1g}$ | -0.98     | -0.98   | $-3.67 \cdot 10^{-3}$ |
|     | $^3A_{2u}$ | -0.63     | -0.63   | $-2.43 \cdot 10^{-3}$ |
|     | $^5A_{1g}$ | 0.00      | 0.00    | 0.00                  |
| 7.5 | $^1A'_1$   | -0.19     | -0.19   | -4.56                 |
|     | $^3A''_2$  | -0.13     | -0.13   | -3.06                 |
|     | $^5A'_1$   | 0.00      | 0.00    | 0.00                  |

Table 10: State-specific energy differences for  $o_p$  of nanotubes calculated by performing CAS-SCF separately for each state followed by geometry optimization and NEVPT2 calculation

### 3 The CI coefficients of the ground state wavefunction

The sections 3 and 4 give the CI vectors which result from the CAS-CI calculations for each of the four family of the nanotubes. It should be noted that in this part there are two/four orbitals for each nanotube and the configurations are made up of the two/four edge orbitals. The letter  $a$  represents the alpha spin and  $b$  the beta spin, double occupancy is marked by a 2 and empty orbitals by 0. The orbitals for the  $e_e$  class of nanotubes consist of two degenerate  $e_3$  orbitals where as the  $e_o$  class of nanotubes consist of two non-degenerate orbitals  $b_{1u}$  and  $b_{2g}$ . The four nanotubes for the  $o_e$  class of nanotubes consist of two pairs of degenerate orbitals  $e_{3g}$  and  $e_{3u}$  and similarly the  $o_o$  class of nanotubes two pairs of degenerate orbitals  $e'_3$  and  $e''_3$ . The electronic configuration can then be written for the  $e_o$  class of orbitals, for example, as follows,  $0.707|b_{1u}\bar{b}_{1u}\rangle + 0.707|b_{2g}\bar{b}_{2g}\rangle$ .

Table 11:  ${}^3A_2$  state CI vectors for 6.4 basis: STO-3G the triplet coefficients are given in the  $m_s=0$  subspace

| configuration | coefficients |
|---------------|--------------|
| a b           | 0.707        |
| b a           | 0.707        |

Table 12:  ${}^3A_2$  state CI vectors for 6.4 basis: cc-pVDZ the triplet coefficients are given in the  $m_s=0$  subspace

| configuration | coefficients |
|---------------|--------------|
| a b           | 0.707        |
| b a           | 0.707        |

Table 13: ground state  ${}^1A_{1g}$  CI vectors for 6.5 basis: STO-3G

| configuration | coefficients |
|---------------|--------------|
| 0 2           | 0.708        |
| 2 0           | -0.707       |

Table 14: ground state  ${}^1A_{1g}$  CI vectors for 6.5 basis: cc-pVDZ

| configuration | coefficients |
|---------------|--------------|
| 0 2           | 0.707        |
| 2 0           | -0.706       |

Table 15: ground state  ${}^1A_{1g}$  CI vectors for 7.4 basis: STO-3G

| configuration | coefficients |
|---------------|--------------|
| 0 2 2 0       | 0.462        |
| 0 0 2 2       | -0.432       |
| 2 2 0 0       | -0.432       |
| 2 0 0 2       | 0.406        |
| b a b a       | -0.288       |
| a b a b       | -0.288       |
| b b a a       | 0.144        |
| a a b b       | 0.144        |
| b a a b       | 0.144        |
| a b b a       | 0.144        |

Table 16: ground state  ${}^1A_{1g}$  CI vectors for 7.4 basis: cc-pVDZ

| configuration | coefficients |
|---------------|--------------|
| 0 2 2 0       | 0.443        |
| 2 2 0 0       | -0.433       |
| 0 0 2 2       | -0.433       |
| 2 0 0 2       | 0.423        |
| b a b a       | -0.289       |
| a b a b       | -0.289       |
| a a b b       | 0.144        |
| b b a a       | 0.144        |
| b a a b       | 0.144        |
| a b b a       | 0.144        |

Table 17: ground state  ${}^1A'_1$  CI vectors for 7.5 basis: STO-3G

| configuration | coefficients |
|---------------|--------------|
| 0 0 2 2       | 0.445        |
| 2 0 0 2       | -0.433       |
| 0 2 2 0       | -0.433       |
| 2 2 0 0       | 0.421        |
| b a b a       | 0.288        |
| a b a b       | 0.288        |
| b a a b       | -0.144       |
| a b b a       | -0.144       |
| b b a a       | -0.144       |
| a a b b       | -0.144       |

Table 18: ground state  ${}^1A'_1$  CI vectors for 7.5 basis: cc-pVDZ

| configuration | coefficients |
|---------------|--------------|
| 0 0 2 2       | 0.437        |
| 2 0 0 2       | -0.433       |
| 0 2 2 0       | -0.433       |
| 2 2 0 0       | 0.429        |
| b a b a       | 0.289        |
| a b a b       | 0.289        |
| b a a b       | -0.144       |
| a b b a       | -0.144       |
| b b a a       | -0.144       |
| a a b b       | -0.144       |



## 4 The CI coefficients of the excited state wavefunctions

Table 19: ground state  ${}^1A_1$  CI vectors for 6\_4 basis: STO-3G

| configuration | coefficients |
|---------------|--------------|
| a b           | -0.707       |
| b a           | 0.707        |

Table 20: ground state  ${}^1A_1$  CI vectors for 6\_4 basis: cc-pVDZ

| configuration | coefficients |
|---------------|--------------|
| a b           | -0.707       |
| b a           | 0.707        |

Table 21:  ${}^1E_2$  state CI vectors for 6\_4 basis: STO-3G

| configuration | coefficients |
|---------------|--------------|
| 0 2           | -0.707       |
| 2 0           | 0.707        |

Table 22:  ${}^1E_2$  state CI vectors for 6\_4 basis: cc-pVDZ

| configuration | coefficients |
|---------------|--------------|
| 0 2           | -0.707       |
| 2 0           | 0.707        |

Table 23:  ${}^3A_{2u}$  state ci vectors for 6\_5 basis: STO-3G

| configuration | coefficients |
|---------------|--------------|
| a a           | 1.000        |

Table 24:  ${}^3A_{2u}$  state ci vectors for 6\_5 basis: cc-pVDZ

| configuration | coefficients |
|---------------|--------------|
| a a           | 1.000        |

Table 25:  ${}^1E_{1g}$  state ci vectors for 6\_5 basis: STO-3G

| configuration | coefficients |
|---------------|--------------|
| a b           | 0.708        |
| b a           | -0.707       |

Table 26:  ${}^1E_{1g}$  state ci vectors for 6\_5 basis: cc-pVDZ

| configuration | coefficients |
|---------------|--------------|
| a b           | 0.707        |
| b a           | -0.707       |

Table 27:  ${}^3A_{2u}$  state ci vectors for 7\_4 basis: STO-3G

| configuration | coefficients |
|---------------|--------------|
| 0 a 2 a       | -0.516       |
| a 2 a 0       | 0.516        |
| a 0 a 2       | -0.484       |
| 2 a 0 a       | 0.484        |

Table 28:  ${}^5A_{1g}$  state ci vectors for 7\_4 basis: STO-3G

| configuration | coefficients |
|---------------|--------------|
| a a a a       | 1.000        |

Table 29:  ${}^3A_{2u}$  state ci vectors for 7\_4 basis: cc-pVDZ

| configuration | coefficients |
|---------------|--------------|
| a 2 a 0       | 0.506        |
| 0 a 2 a       | -0.506       |
| 2 a 0 a       | 0.494        |
| a 0 a 2       | -0.494       |

Table 30:  ${}^5A_{1g}$  state ci vectors for 7\_4 basis: cc-pVDZ

| configuration | coefficients |
|---------------|--------------|
| a a a a       | 1.000        |

Table 31:  ${}^3A_2''$  state ci vectors for 7.5 basis: STO-3G

| configuration | coefficients |
|---------------|--------------|
| a 0 a 2       | 0.507        |
| 0 a 2 a       | 0.507        |
| 2 a 0 a       | -0.493       |
| a 2 a 0       | -0.493       |

Table 32:  ${}^5A_1'$  state ci vectors for 7.5 basis: STO-3G

| configuration | coefficients |
|---------------|--------------|
| a a a a       | 1.000        |

Table 33:  ${}^3A_2''$  state ci vectors for 7.5 basis: cc-pVDZ

| configuration | coefficients |
|---------------|--------------|
| a 0 a 2       | 0.502        |
| 0 a 2 a       | 0.502        |
| 2 a 0 a       | -0.498       |
| a 2 a 0       | -0.498       |

Table 34:  ${}^5A_1'$  state ci vectors for 7.5 basis: cc-pVDZ

| configuration | coefficients |
|---------------|--------------|
| a a a a       | 1.000        |
